# Supplementary material for: Robust winter warming over Eurasia under stratospheric sulfate geoengineering – the role of stratospheric dynamics
Source: Copernicus journal article supplement (doi:10.5194/acp-21-6985-2021), 2021-05-07
Supplement: Supplementary file 1 [file acp-21-6985-2021-supplement.pdf]

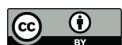

*Supplement of*

## **Robust winter warming over Eurasia under stratospheric sulfate geoengineering – the role of stratospheric dynamics**

**Antara Banerjee et al.**

*Correspondence to:* Antara Banerjee ([antara.banerjee@noaa.gov](mailto:antara.banerjee@noaa.gov))

The copyright of individual parts of the supplement might differ from the article licence.

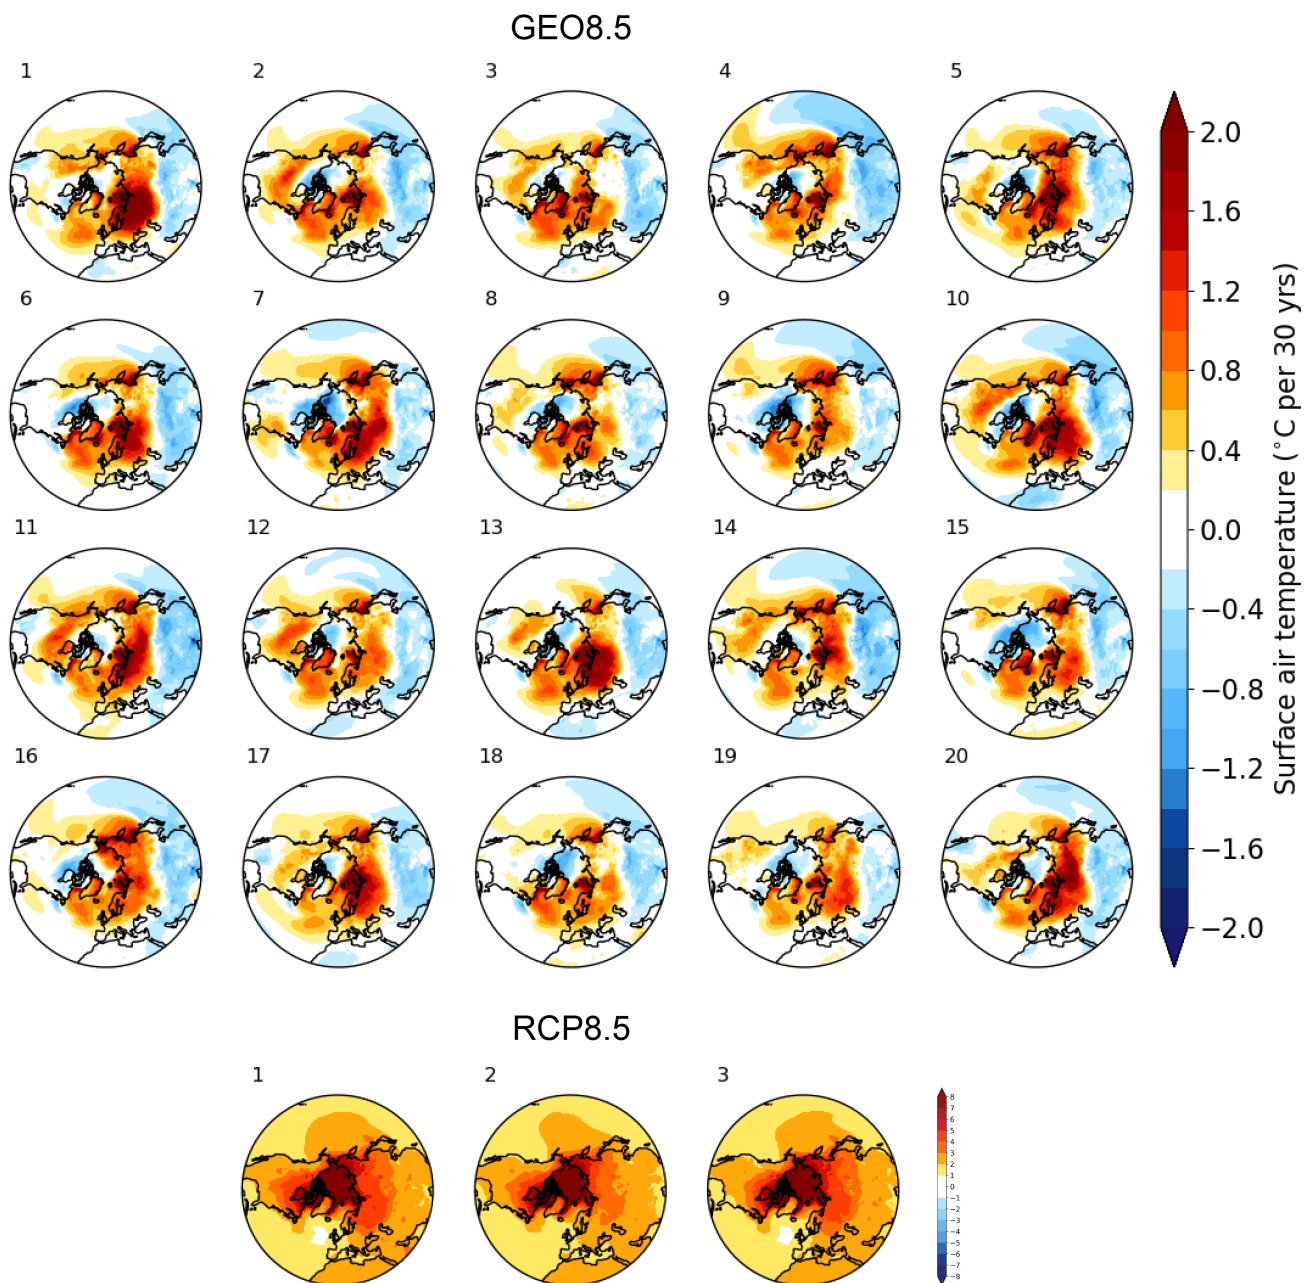

**Figure S1. Linear trends over 2020-2095 in near-surface air temperature ( $^{\circ}\text{C}$  per 30 years) in each ensemble member of the GEO8.5 and RCP8.5 experiments.**

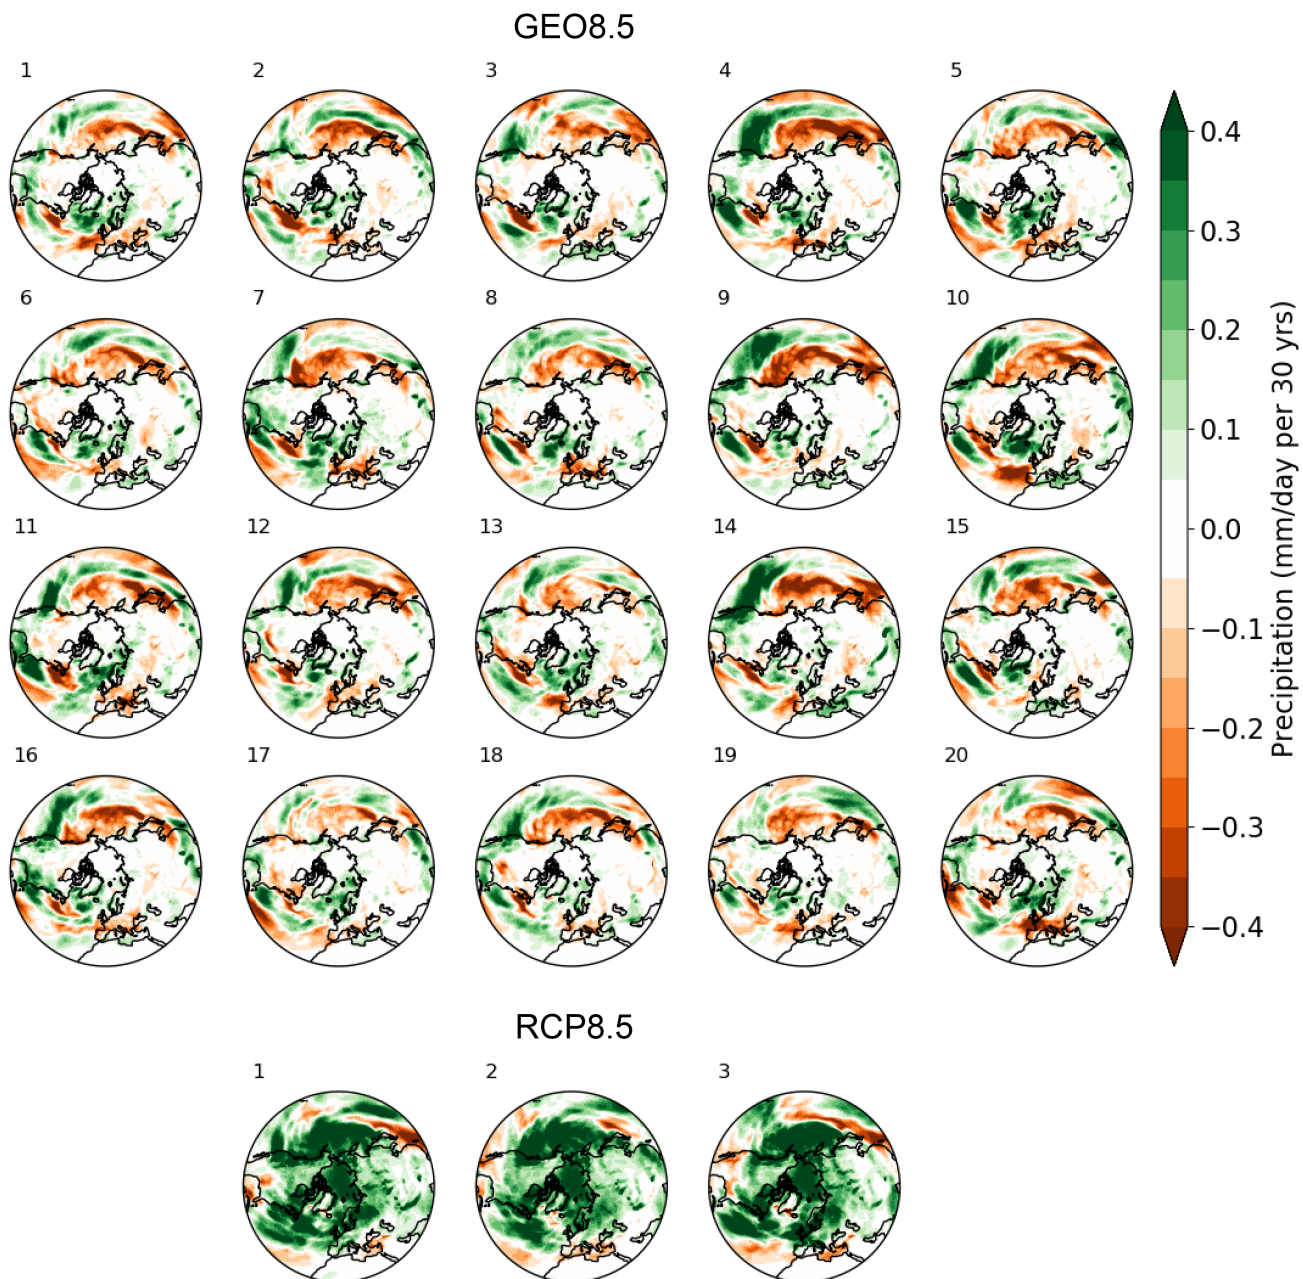

5 **Figure S2. Linear trends over 2020-2095 in total precipitation (mm/day per 30 years) in each ensemble member of the GEO8.5 and RCP8.5 experiments.**

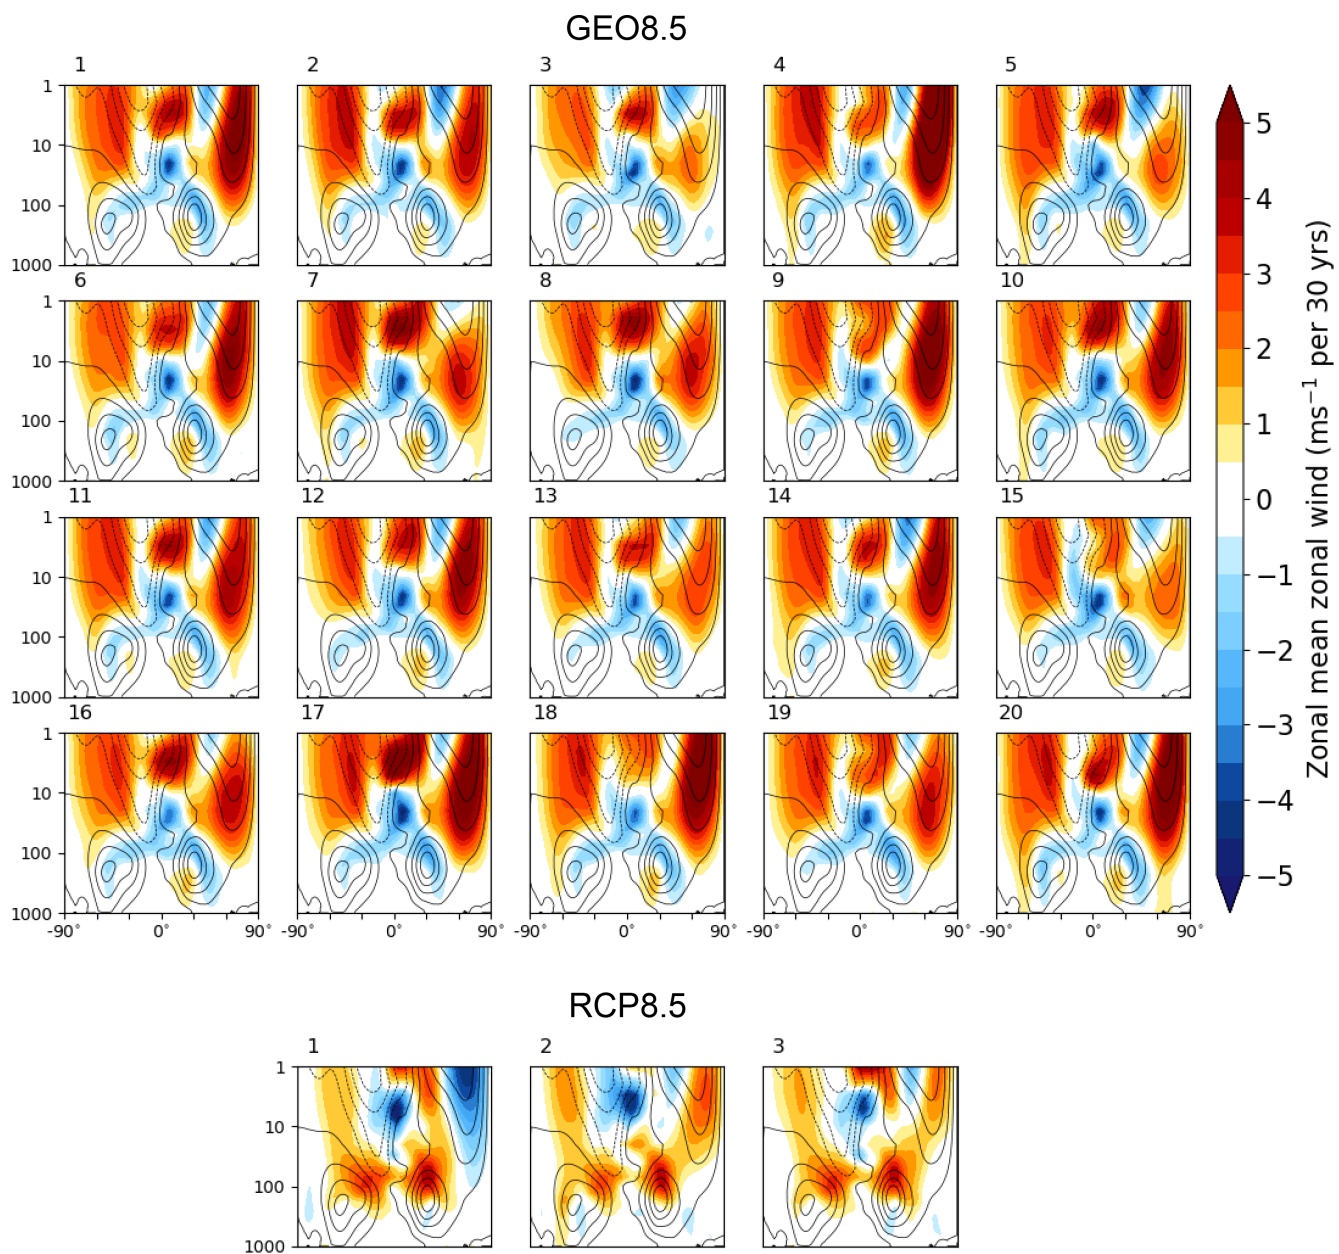

**Figure S3. Linear trends over 2020-2095 in zonal mean zonal wind ( $\text{ms}^{-1}$  per 30 years) in each ensemble member of the GEO8.5 and RCP8.5 experiments.**

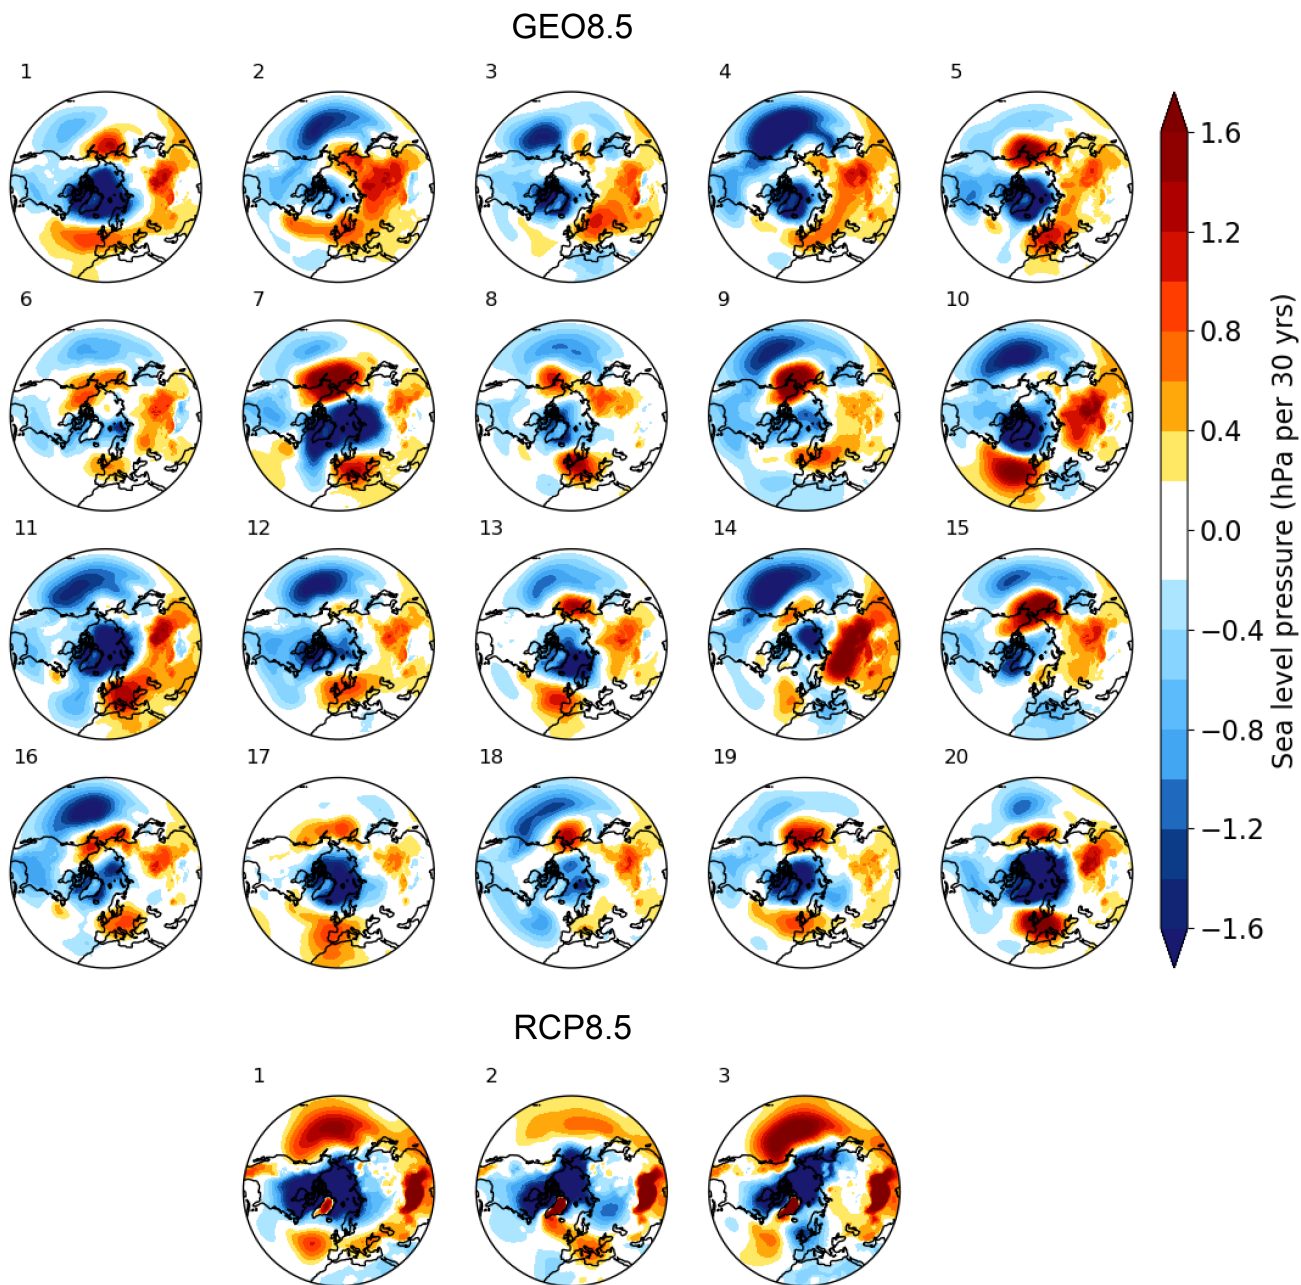

**Figure S4. Linear trends over 2020-2095 in sea level pressure (hPa per 30 years) in each ensemble member of the GEO8.5 and RCP8.5 experiments.**
